# Supplementary material for: Increased photosensitivity at early growth as a possible mechanism of maize adaptation to cold springs
Source: PubMed Central journal article supplement — J Exp Bot. 2019 Mar 2;70(10):2887–904. doi: 10.1093/jxb/erz096 (PMC6506767; doi:10.1093/jxb/erz096), 2019-03-02
Supplement: erz096_suppl_supplemental_tables-s1-s3.pdf [file erz096_suppl_supplemental_tables-s1-s3.pdf]

Tab. S1. Primers for RT-qPCR

| <b>ID</b>     | <b>Gene</b> | <b>Primer sequences</b>                                              |
|---------------|-------------|----------------------------------------------------------------------|
| GRMZM2G060702 | ACT         | Forward: CAAACAGCCTCCCTGAGAATG<br>Reverse: TGGACATCCTCTGCAGTAACAAA   |
| GRMZM2G118637 | UBQ         | Forward: GTGAGTCGTGACTGAGCTGGTT<br>Reverse: ATATGCGGTCGCACGATAGTT    |
| GRMZM2G157727 | PHYA1       | Forward: GCAAGAGTGGTATCTGGTGGT<br>Reverse: CATCAAGGGTTGTTTGTGCT      |
| GRMZM2G181028 | PHYA2       | Forward: AGAGCAGATGAGGCAGGTTTC<br>Reverse: GACTTACAGCAGACACCACCA     |
| GRMZM2G124532 | PHYB1       | Forward: GGAGGCTGTGTGTGGAATG<br>Reverse: CTGTGTGTGACCGAAACCAA        |
| GRMZM2G092174 | PHYB2       | Forward: GAGAATGGCTGGGTAGAAA<br>Reverse: GCAAACCTGAAGATGAAAAGC       |
| GRMZM2G057935 | PHYC1       | Forward: TGGCTGCTACTGAAACATCG<br>Reverse: CCAAATCTATCCGCACTACACA     |
| GRMZM2G129889 | PHYC2       | Forward: CAAACGAGATGGTCCGCTTA<br>Reverse: TCAACAGAATCAGCAACAACAA     |
| GRMZM2G001457 | PHOT1       | Forward: CCTCAAGTTCATTGGGATGC<br>Reverse: CATTGGACGAAGAGCAGTATC      |
| GRMZM2G032351 | PHOT2       | Forward: ACGGCAAGGTCATCAAGTTC<br>Reverse: AACTGGCATCTCGTTTGG         |
| GRMZM2G049549 | CRY2        | Forward: TAGTGCGGTTGGCTTTACAA<br>Reverse: TTACGGTTACATACATCACATACCTC |

Tab. S2. Raw results of ANOVA

*Ion leakage (Tab. 1)*

| <b>Model term</b>    | <b>df1</b> | <b>df2</b> | <b>F</b> | <b>p</b> |
|----------------------|------------|------------|----------|----------|
| Conditions           | 2          | 805        | 461.651  | <0.001   |
| Time                 | 3          | 805        | 318.903  | <0.001   |
| Line                 | 4          | 805        | 86.243   | <0.001   |
| Conditions:Time      | 6          | 805        | 84.242   | <0.001   |
| Conditions:Line      | 8          | 805        | 14.065   | <0.001   |
| Time:Line            | 12         | 805        | 3.805    | <0.001   |
| Conditions:Time:Line | 24         | 805        | 6.482    | <0.001   |

*Leaf Area (Fig. 2A)*

| <b>Model term</b> | <b>df1</b> | <b>df2</b> | <b>F</b> | <b>p</b> |
|-------------------|------------|------------|----------|----------|
| Conditions        | 1          | 375        | 40.384   | <0.001   |
| Line              | 4          | 375        | 106.130  | <0.001   |
| Conditions:Line   | 4          | 375        | 4.032    | 0.003    |

*Shoot length (Fig. 2B)*

| <b>Model term</b> | <b>df1</b> | <b>df2</b> | <b>F</b> | <b>p</b> |
|-------------------|------------|------------|----------|----------|
| Conditions        | 1          | 375        | 2184.998 | <0.001   |
| Line              | 4          | 375        | 296.268  | <0.001   |
| Conditions:Line   | 4          | 375        | 13.117   | <0.001   |

*Mesocotyl length (Fig. 2C)*

| <b>Model term</b> | <b>df1</b> | <b>df2</b> | <b>F</b> | <b>p</b> |
|-------------------|------------|------------|----------|----------|
| Conditions        | 1          | 375        | 1385.902 | <0.001   |
| Line              | 4          | 375        | 84.759   | <0.001   |
| Conditions:Line   | 4          | 375        | 5.989    | <0.001   |

*FvFm (Fig. 3A)*

| <b>Model term</b> | <b>df1</b> | <b>df2</b> | <b>F</b> | <b>p</b> |
|-------------------|------------|------------|----------|----------|
| Conditions        | 1          | 430        | 1766.147 | <0.001   |
| Line              | 4          | 430        | 17.494   | <0.001   |
| Conditions:Line   | 4          | 430        | 15.337   | <0.001   |

*Yield (Fig. 3B)*

| <b>Model term</b> | <b>df1</b> | <b>df2</b> | <b>F</b> | <b>p</b> |
|-------------------|------------|------------|----------|----------|
| Conditions        | 1          | 430        | 821.072  | <0.001   |
| Line              | 4          | 430        | 4.481    | 0.001    |
| Conditions:Line   | 4          | 430        | 12.591   | <0.001   |

*Chlorophyll (Fig. 4A)*

| <b>Model term</b> | <b>df1</b> | <b>df2</b> | <b>F</b> | <b>p</b> |
|-------------------|------------|------------|----------|----------|
| Conditions        | 1          | 160        | 216.272  | <0.001   |
| Line              | 4          | 160        | 15.526   | <0.001   |
| Conditions:Line   | 4          | 160        | 1.714    | 0.149    |

*Anthocyanin (Fig. 4B)*

| <b>Model term</b> | <b>df1</b> | <b>df2</b> | <b>F</b> | <b>p</b> |
|-------------------|------------|------------|----------|----------|
| Conditions        | 1          | 160        | 251.964  | <0.001   |
| Line              | 4          | 160        | 28.559   | <0.001   |
| Conditions:Line   | 4          | 160        | 11.483   | <0.001   |

*Carotenoid (Fig. 4C)*

| <b>Model term</b> | <b>df1</b> | <b>df2</b> | <b>F</b> | <b>p</b> |
|-------------------|------------|------------|----------|----------|
| Conditions        | 1          | 160        | 8.618    | 0.003    |
| Line              | 4          | 160        | 13.706   | <0.001   |
| Conditions:Line   | 4          | 160        | 6.251    | <0.001   |

*Photosynthesis vs sowing depth vs soil temperature (Fig. 6 and Fig. S1, S2, S3)*

Fv/Fm

| <b>model term</b>           | <b>df1</b> | <b>df2</b> | <b>F</b> | <b>p.value</b> |
|-----------------------------|------------|------------|----------|----------------|
| Conditions                  | 1          | 649        | 6298.212 | <0.001         |
| Sowing                      | 1          | 649        | 0.097    | 0.7555927      |
| Temp                        | 2          | 649        | 565.549  | <0.001         |
| Line                        | 4          | 649        | 293.430  | <0.001         |
| Conditions:Sowing           | 1          | 649        | 2.305    | 0.1289300      |
| Conditions:Temp             | 2          | 649        | 480.701  | <0.001         |
| Conditions:Line             | 4          | 649        | 194.774  | <0.001         |
| Sowing:Temp                 | 2          | 649        | 2.682    | 0.0684223      |
| Sowing:Line                 | 4          | 649        | 9.463    | <0.001         |
| Temp:Line                   | 8          | 649        | 17.019   | <0.001         |
| Conditions:Sowing:Temp      | 2          | 649        | 3.822    | 0.0218931      |
| Conditions:Sowing:Line      | 4          | 649        | 4.812    | 0.0007023      |
| Conditions:Temp:Line        | 8          | 649        | 15.665   | <0.001         |
| Sowing:Temp:Line            | 8          | 649        | 1.389    | 0.1954248      |
| Conditions:Sowing:Temp:Line | 8          | 649        | 0.447    | 0.8931585      |

Y

| <b>model term</b>           | <b>df1</b> | <b>df2</b> | <b>F</b> | <b>p.value</b> |
|-----------------------------|------------|------------|----------|----------------|
| Conditions                  | 1          | 649        | 9914.979 | <0.001         |
| Sowing                      | 1          | 649        | 40.494   | <0.001         |
| Temp                        | 2          | 649        | 331.926  | <0.001         |
| Line                        | 4          | 649        | 61.896   | <0.001         |
| Conditions:Sowing           | 1          | 649        | 34.107   | <0.001         |
| Conditions:Temp             | 2          | 649        | 333.614  | <0.001         |
| Conditions:Line             | 4          | 649        | 108.690  | <0.001         |
| Sowing:Temp                 | 2          | 649        | 0.875    | 0.4167915      |
| Sowing:Line                 | 4          | 649        | 9.436    | <0.001         |
| Temp:Line                   | 8          | 649        | 3.604    | 0.0003394      |
| Conditions:Sowing:Temp      | 2          | 649        | 1.021    | 0.3602939      |
| Conditions:Sowing:Line      | 4          | 649        | 10.293   | <0.001         |
| Conditions:Temp:Line        | 8          | 649        | 9.365    | <0.001         |
| Sowing:Temp:Line            | 8          | 649        | 1.697    | 0.0935286      |
| Conditions:Sowing:Temp:Line | 8          | 649        | 2.513    | 0.0099484      |

*Photosensitivity (Fig. 7)*

| <b>Model term</b>     | <b>df1</b> | <b>df2</b> | <b>F</b> | <b>p</b> |
|-----------------------|------------|------------|----------|----------|
| Conditions            | 1          | 955        | 3843.148 | <0.001   |
| Line                  | 4          | 955        | 1038.822 | <0.001   |
| Light                 | 3          | 955        | 214.044  | <0.001   |
| Conditions:Line       | 4          | 955        | 341.182  | <0.001   |
| Conditions:Light      | 3          | 955        | 317.700  | <0.001   |
| Line:Light            | 12         | 955        | 6.903    | <0.001   |
| Conditions:Line:Light | 12         | 955        | 13.866   | <0.001   |

*Gibberellin effect (Fig. 9)*

| <b>model term</b> | <b>df1</b> | <b>df2</b> | <b>F</b> | <b>p.value</b> |
|-------------------|------------|------------|----------|----------------|
| Conditions        | 1          | 138        | 195.518  | <0.001         |
| Line              | 4          | 138        | 937.150  | <0.001         |
| Conditions:Line   | 4          | 138        | 13.741   | <0.001         |

*FvFm extended set of lines (Fig. S5)*

| <b>Model term</b> | <b>df1</b> | <b>df2</b> | <b>F</b> | <b>p</b> |
|-------------------|------------|------------|----------|----------|
| Conditions        | 1          | 763        | 3964.066 | <0.001   |
| Line              | 20         | 763        | 10.662   | <0.001   |
| Conditions:Line   | 20         | 763        | 11.560   | <0.001   |

*Yield extended set of lines (Fig. S6)*

| <b>Model term</b> | <b>df1</b> | <b>df2</b> | <b>F</b> | <b>p.value</b> |
|-------------------|------------|------------|----------|----------------|
| Conditions        | 1          | 763        | 6637.318 | <0.001         |
| Line              | 20         | 763        | 6.460    | <0.001         |
| Conditions:Line   | 20         | 763        | 5.122    | <0.001         |

Tab. S3. Sequence variants of genes potentially involved in gibberellin signaling in three maize inbred lines. Genes were assigned to the gibberellin signaling pathway following Reactome (<http://plantreactome.gramene.org/>). Genomes of inbred lines S160, S50676, and S68911 were re-sequenced to 30-fold coverage and compared with the reference B73 genome. SNP and indel variants were evaluated for importance with the use of Snpshift software (<http://snpeff.sourceforge.net/SnpSift.html>). Only variants of high importance are shown.

| Gene name                                              | Reference sequence | Modified sequence                          | S68911 | S50676 | S160 | Description                                                                                                                                                                                                                                                                                                                                                                                                                                                                                                                                                 |
|--------------------------------------------------------|--------------------|--------------------------------------------|--------|--------|------|-------------------------------------------------------------------------------------------------------------------------------------------------------------------------------------------------------------------------------------------------------------------------------------------------------------------------------------------------------------------------------------------------------------------------------------------------------------------------------------------------------------------------------------------------------------|
| AC194970.5_FG002<br>bZR7 - BZR-transcription factor 7  | indel<br>CGG       | indel<br>CGGG<br>frameshift_variant        | 0/0    | 0/0    | 1/1  | AT1G75080.1 (BZR1) Brassinosteroid signalling positive regulator (BZR1) family protein<br><br>Encodes a positive regulator of the brassinosteroid (BR) signalling pathway that mediates both downstream BR responses and negative feedback regulation of BR biosynthesis. There is evidence for phosphorylation-dependent nucleocytoplasmic shuttling of BZR1. GSK3-like kinases (including BIN2), 14-3-3 proteins, and the phosphatase BSU1 seem to participate in this process. Phosphorylation also appears to affect BZR1's transcriptional activities. |
| GRMZM2G016756<br>bhlh60 - bHLH-transcription factor 60 | indel<br>GGCG      | indel<br>GGCGCGCG<br>frameshift_variant    | 0/0    | 0/0    | 1/1  | AT2G43010.1 (PIF4, SRL2) phytochrome interacting factor 4<br><br>Isolated as a semidominant mutation defective in red -light responses. Encodes a nuclear localized bHLH protein that interacts with active PhyB protein. Negatively regulates phyB mediated red light responses. Involved in shade avoidance response. Protein abundance is negatively regulated by PhyB.                                                                                                                                                                                  |
| GRMZM2G042666<br>idd7 - indeterminate1 domain7         | CCCGGCC            | CCCGGCCGGCCGCC<br>frameshift_variant       | 0/0    | 0/0    | 1/1  | AT2G02080.1 (AtIDD4, IDD4) indeterminate(ID)-domain 4<br><br>C2H2 BIRD transcription factor family.                                                                                                                                                                                                                                                                                                                                                                                                                                                         |
| GRMZM2G046290                                          | indel<br>ACG       | indel<br>ACGGCGAGTCG<br>frameshift_variant | 0/0    | 1/1    | 0/0  | AT3G13810.1 (AtIDD11, IDD11) indeterminate(ID)-domain 11                                                                                                                                                                                                                                                                                                                                                                                                                                                                                                    |
| GRMZM2G089736<br>zim23 - ZIM-transcription factor 23   | indel<br>TTGT      | indel<br>TT<br>frameshift_variant          | 1/1    | 1/1    | 0/0  | AT1G74950.1 (JAZ2, TIFY10B) TIFY domain/Divergent CCT motif family protein<br><br>JAZ2 - JASMONATE-ZIM-DOMAIN PROTEIN 2                                                                                                                                                                                                                                                                                                                                                                                                                                     |

|                                                                |                                               |                                                                                                      |     |     |     |                                                                                                                                                                                                                                                                                                                                                      |
|----------------------------------------------------------------|-----------------------------------------------|------------------------------------------------------------------------------------------------------|-----|-----|-----|------------------------------------------------------------------------------------------------------------------------------------------------------------------------------------------------------------------------------------------------------------------------------------------------------------------------------------------------------|
| GRMZM2G065374<br><br>bhlh47 - bHLH-<br>transcription factor 47 | indel                                         |                                                                                                      | 1/1 | 0/0 | 0/0 | AT3G59060.2 (PIF5, PIL6) phytochrome interacting factor 3-like 6<br><br>Encodes a novel Myc-related bHLH transcription factor, which physically associated with APRR1/TOC1 and is a member of PIF3 transcription factor family. Involved in shade avoidance. Functions as negative regulator of PhyB. Protein levels are modulated by phytochrome B. |
|                                                                | ACTGCTGCGTGCTGCTGC                            | ACTGCTGC<br>frameshift_variant                                                                       |     |     |     |                                                                                                                                                                                                                                                                                                                                                      |
|                                                                | SNP                                           |                                                                                                      | 0/0 | 1/1 | 0/0 |                                                                                                                                                                                                                                                                                                                                                      |
| C                                                              | T<br>splice_donor_variant &<br>intron_variant |                                                                                                      |     |     |     |                                                                                                                                                                                                                                                                                                                                                      |
| GRMZM2G123094                                                  | indel                                         |                                                                                                      | 0/0 | 1/1 | 0/0 | AT1G25250.1 (AtIDD16, IDD16) indeterminate(ID)-domain 16<br><br>Encodes a transcription factor that, together with IDD14 and IDD15, regulates auxin biosynthesis and transport and thus aerial organ morphogenesis and gravitropic responses.                                                                                                        |
|                                                                | TCTCGTACTCGTAC                                | TCTCGTAC<br>splice_donor_variant&splice_ region_variant &<br>3_prime_UTR_variant &<br>intron_variant |     |     |     |                                                                                                                                                                                                                                                                                                                                                      |
|                                                                | SNP                                           |                                                                                                      | 0/1 | 0/1 | 0/0 |                                                                                                                                                                                                                                                                                                                                                      |
| C                                                              | A<br>stop_gained                              |                                                                                                      |     |     |     |                                                                                                                                                                                                                                                                                                                                                      |
| GRMZM2G179677<br><br>iddp1 - indeterminate<br>domain p1        | indel                                         |                                                                                                      | 0/0 | 0/0 | 1/1 | AT3G50700.1 (AtIDD2, IDD2) indeterminate(ID)-domain 2                                                                                                                                                                                                                                                                                                |
|                                                                | CGT                                           | CGTGT<br>frameshift_variant                                                                          |     |     |     |                                                                                                                                                                                                                                                                                                                                                      |
|                                                                | indel                                         |                                                                                                      | 0/0 | 0/0 | 1/1 |                                                                                                                                                                                                                                                                                                                                                      |
|                                                                | G                                             | GA<br>frameshift_variant                                                                             |     |     |     |                                                                                                                                                                                                                                                                                                                                                      |
|                                                                | SNP                                           |                                                                                                      | 0/0 | 0/0 | 1/1 |                                                                                                                                                                                                                                                                                                                                                      |
| C                                                              | T<br>stop_gained                              |                                                                                                      |     |     |     |                                                                                                                                                                                                                                                                                                                                                      |
| GRMZM2G016605<br><br>Gibberellin receptor<br>GID1A             | SNP                                           |                                                                                                      | 0/0 | 1/1 | 0/0 | LOC_Os05g33730.1 gibberellin receptor GID1L2 putative expressed                                                                                                                                                                                                                                                                                      |
|                                                                | C                                             | T<br>stop_gained                                                                                     |     |     |     |                                                                                                                                                                                                                                                                                                                                                      |
